# Supplementary material
Source: publisher figshare collection journal article supplement (https://tandf.figshare.com/ndownloader/files/17291837)
Supplement: Supplementary file 1 [file 17291837]

## Supporting Information

### Hydrogen bond analysis of confined water in mesoporous silica using the reactive force field

Tomoko Mizuguchi<sup>1)</sup>, Katsumi Hagita<sup>2)</sup>, Susumu Fujiwara<sup>1)</sup>, and Takeshi Yamada<sup>3)</sup>

- <sup>1)</sup> Faculty of Materials Science and Engineering, Kyoto Institute of Technology,  
Matsugasaki, Sakyo-ku, Kyoto 606-8585, Japan
- <sup>2)</sup> Department of Applied Physics, National Defense Academy, 1-10-20 Hashirimizu,  
Yokosuka, Kanagawa 239-8686, Japan
- <sup>3)</sup> CROSS Neutron Science and Technology Center, IQBRC Bldg., 162-1 Shirakata,  
Tokai, Naka, Ibaraki 319-1106, Japan

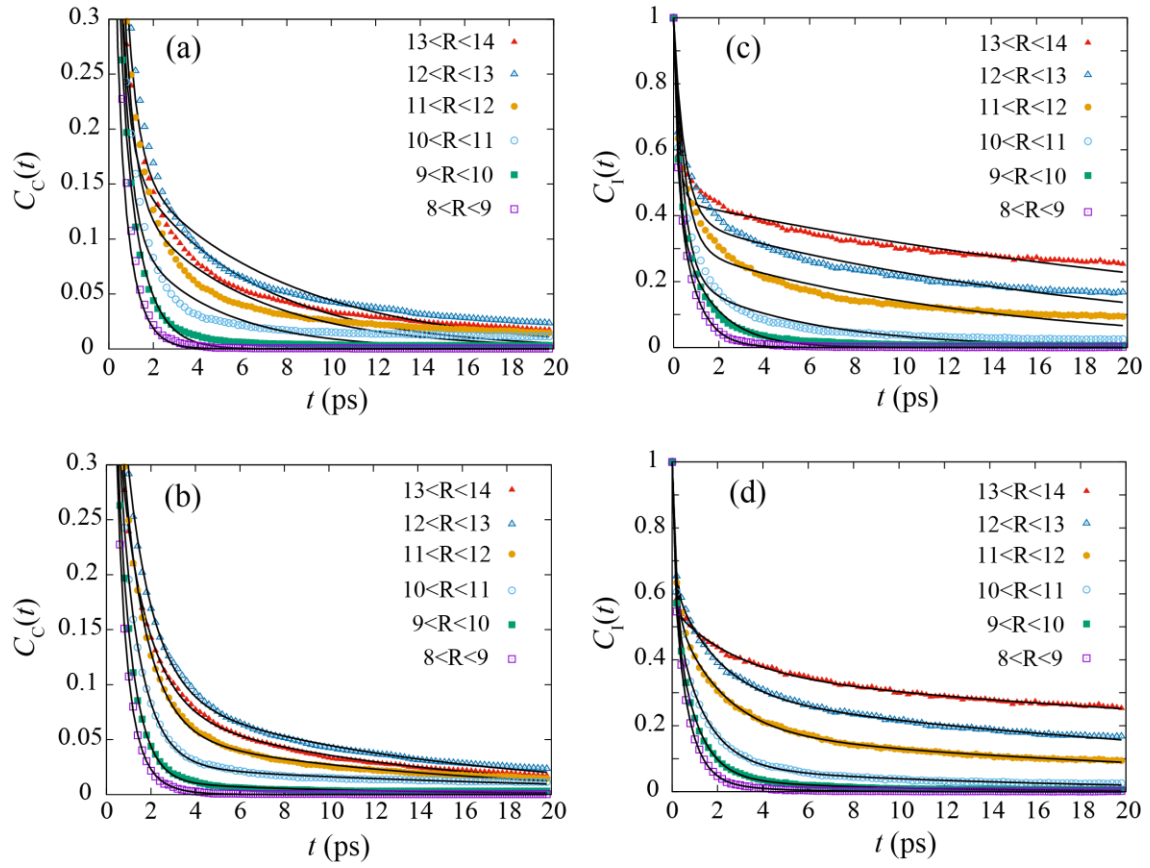

Fig.S1. The autocorrelation functions of H-bonds defined as Eq.4 in interfacial layers: (a), (b) the continuous one  $C_C(t)$  and (c), (d) the intermittent one  $C_I(t)$ . The black solid lines are fitting functions: (a), (c) the sum of two exponentials and (b), (d) three exponentials. Those at  $0 < R < 8$  Å are overlapped and thus are not shown.
